# Supplementary material for: Trust-building in temporary public health partnerships: a qualitative study of the partnership formation process of a Covid-19 test, trace and protect service
Source: Springer Nature journal article supplement (doi:10.1186/s12913-024-10930-3), 2024-04-13
Supplement: MOESM1 [file 12913_2024_10930_MOESM1_ESM.pdf]

**Additional Table 1** Data Extraction for “Managing risk”, “Collaborative set-up of service”

| Stage* | Cause                                                                                                                     | Theme                                                                              | Effect                                                                                | Source    |
|--------|---------------------------------------------------------------------------------------------------------------------------|------------------------------------------------------------------------------------|---------------------------------------------------------------------------------------|-----------|
| 1      |                                                                                                                           | The collaborative, supportive nature of the set-up of service is seen as a success | Team view incorporates all partners<br>(Big team feeling)<br>(Faith in collaboration) | I9: 3     |
| 1      | Each partner contributed expertise<br>Strong project management                                                           | A rapid and structured way to set up a service                                     | Successful governance structure<br>Highly effective                                   | I11: 8    |
| 1      | Commitment to partnership and common aim                                                                                  | High speed of response                                                             | (Feeling that ability to work together is the key success of service)                 | I11: 16   |
| 1      | Commitment to partnership<br>Adequate funding                                                                             | High speed of service set-up                                                       | Nurtures commitment to partnership<br>(Faith in collaboration)                        | I2: 13    |
| 1      | The willingness of partner organisations to participate in the planning, implementation and improvement of service        | Rapid establishment of GTTPS                                                       | (Feeling that ability to work together is the key success of service)                 | I3: 4     |
| 1      |                                                                                                                           | Quick running of service                                                           | Feeling that ability to work together is critical to success                          | I6: 11-12 |
| 1      | Commitment to a common aim, willingness to invest time, streamlining bureaucratic procedures, and working outcome-focused | Successful set-up of service, very quickly with very little knowledge              | (Feeling that ability to work together is the key to the success of service)          | I8: 10    |

\* Partnership stages:

1 Formation: Identification of partners, the definition of a common aim, partnership structure

2 Development: Set up of partnership structures, building relationships

3 Solidification: Solidification of partnership structures and relations
