# Supplementary material for: Trust-building in temporary public health partnerships: a qualitative study of the partnership formation process of a Covid-19 test, trace and protect service
Source: Springer Nature journal article supplement (doi:10.1186/s12913-024-10930-3), 2024-04-13
Supplement: MOESM2 [file 12913_2024_10930_MOESM2_ESM.pdf]

**Additional Table 2** Summary of trust-building processes emanating from content analysis

| Stage*                                           | Theme                                                      | Cause                                                                                   | Effect                                            | Source                                                |
|--------------------------------------------------|------------------------------------------------------------|-----------------------------------------------------------------------------------------|---------------------------------------------------|-------------------------------------------------------|
| <b>Initiating the trust-building loop</b>        |                                                            |                                                                                         |                                                   |                                                       |
| <b>1. Forming expectations</b>                   |                                                            |                                                                                         |                                                   |                                                       |
| <b>1.1 Previous experiences of collaboration</b> |                                                            |                                                                                         |                                                   |                                                       |
| 2                                                | Structured set-up of service and started operating quickly | Previous positive experiences in working together                                       | Increased faith in collaboration                  | I10, I13, I14                                         |
| 1,2                                              | Familiarity, trust and acceptance between partners         | Existing good relationships between partners, Personal networks                         | Faith in cooperative behaviour                    | I3, I9                                                |
| <b>1.2 Need for collaboration</b>                |                                                            |                                                                                         |                                                   |                                                       |
| 1                                                | Need to pool information, knowledge and expertise          | Threat, urgency and unpredictability of the pandemic situation                          | Willing to collaborate, Commitment to partnership | I1, I3, I11                                           |
| 1                                                | Need to pool personnel and financial resources             | Need for resources                                                                      | Willing to collaborate, Commitment to partnership | I1, I9                                                |
| 1                                                | Facing the same difficulties                               | The threat, urgency, and unpredictability of the pandemic situation                     | Unifying effect<br>Willing to support each other  | I9, I12                                               |
| <b>1.3 Commitment to a common aim</b>            |                                                            |                                                                                         |                                                   |                                                       |
| 2                                                | Workforce highly committed to a common aim.                | Recruitment and personnel development strategies, Leadership behaviour (Role modelling) | Easy relationship building, Big team feeling      | I1, I4, I6, I7<br>I13, NHS 360 leadership development |
| 2                                                | Leaders highly committed to common aims and partnership    | Leadership Behaviour                                                                    | Trust in leaders                                  | I9, NHS 360 leadership development                    |
| 3                                                | Less commitment to partnership                             | Different priorities, less urgency of purpose, funding concerns                         | Less willingness to collaborate                   | I2                                                    |
| <b>2. Managing risk</b>                          |                                                            |                                                                                         |                                                   |                                                       |
| <b>2.1 Collaborative set-up of the service</b>   |                                                            |                                                                                         |                                                   |                                                       |
| 1                                                | The collaborative, supportive nature of service set-up     | Commitment to common aim and partnership                                                | Faith in collaboration<br>Big team feeling        | I2, I3, I7, I9, I10, I12                              |

| Stage*                                      | Theme                                                           | Cause                                                                     | Effect                                                                          | Source                                        |
|---------------------------------------------|-----------------------------------------------------------------|---------------------------------------------------------------------------|---------------------------------------------------------------------------------|-----------------------------------------------|
| <b>Sustaining the trust-building loop</b>   |                                                                 |                                                                           |                                                                                 |                                               |
| <b>1. Managing power imbalances</b>         |                                                                 |                                                                           |                                                                                 |                                               |
| <b>1.1 Governance structure</b>             |                                                                 |                                                                           |                                                                                 |                                               |
| 2, 3                                        | Shared decision-making forum (funding and resources)            | Equal representation of all partner organisations in the Leadership group | Commitment to partnership and common aim, Trust in governance structures        | I1, I2, I3, I5, I9, I12, governance framework |
| 2                                           | Coordination Unit situated at the local authority               | Avoid unequal power distribution among partner organisations              | Acceptance and trust in governance structures                                   | I1, I2                                        |
| 1, 2, 3                                     | Local ownership of partner organisations                        | Decentralised service structures                                          | Flexibility in decision-making<br>Acceptance and trust in governance structures | I9, I12                                       |
| <b>1.2 Shared decision-making</b>           |                                                                 |                                                                           |                                                                                 |                                               |
| 2,3                                         | Supportive, approachable staff                                  | Network communication                                                     | Support network, Close working bonds                                            | I4, I5, I7, I9, I13, S79                      |
| 1                                           | Collective decision-making                                      | Emergency                                                                 | Shared decision-making<br>Equal power distribution                              | I2, I3                                        |
| 1, 2, 3                                     | Solution-oriented decision-making without hierarchical thinking | Leadership behaviour and attitudes                                        | Equal power distribution                                                        | I1, I2, I4, I6, I10                           |
| 2, 3                                        | Acknowledgement of partner views and contributions              | Leadership behaviour and attitudes                                        | Trusting relationships<br>Local ownership                                       | I7, I10, I12                                  |
| <b>1.3 Dealing with power imbalances</b>    |                                                                 |                                                                           |                                                                                 |                                               |
| 2,3                                         | Tensions aroused from central control                           | Governance structure based on support rather than control                 | Acceptance and trust in governance structures                                   | I1, I6, I7, I9, governance framework          |
| <b>1.4 Dealing with tension and failure</b> |                                                                 |                                                                           |                                                                                 |                                               |
| 2, 3                                        | Acknowledgement of partner views and contributions              | Leadership behaviour and attitudes                                        | Trusting relationships<br>Local ownership                                       | I7, I10, I12                                  |
| 1, 2, 3                                     | Open failure culture                                            | Acceptance of failure<br>Limited bureaucracy                              | Feeling safe and trusted                                                        | I2, I3, I4, I9, I10                           |
| Stage*                                      | Theme                                                           | Cause                                                                     | Effect                                                                          | Source                                        |

---

## **2. Nurturing the collaborative relationships**

### **2.1 Network communication**

|      |                                                            |                                                |                                                  |                         |
|------|------------------------------------------------------------|------------------------------------------------|--------------------------------------------------|-------------------------|
| 2    | Frequent communication across partner organisations        | High frequency of formal and informal meetings | Mutual understanding, High-quality relationships | I2, I3, I7, I8, I9, I13 |
| 2, 3 | Smooth communication across partner organisations          | Flat organisational hierarchy                  | Networking, High-quality relationships           | I4, I5                  |
| 2    | Understanding the roles and tasks of partner organisations | Changing positions within the partnership      | Mutual understanding, High-quality relationships | I10, I13                |

### **2.2 Approachable, supportive workforce**

|      |                                |                                                             |                                         |                           |
|------|--------------------------------|-------------------------------------------------------------|-----------------------------------------|---------------------------|
| 2, 3 | Supportive, approachable staff | Flat organisational structure<br>Less hierarchical thinking | Support network                         | I2, I4, I5, I6, I13, S 79 |
| 2, 3 | Supportive, approachable staff | Network communication                                       | Support network, Close working bonds    | I4, I5, I7, I9, I13, S79  |
| 2, 3 | Supportive, approachable staff | Personalities of leaders and staff                          | Support network, Close working bonds    | I6, I7, I12, I14          |
| 2, 3 | Supportive, approachable staff | Commitment to a common aim                                  | Close working bonds, Mutual recognition | I6, I7, I9, I13           |

### **2.3 Situational awareness**

|      |                                |                                                                 |                                                                       |                     |
|------|--------------------------------|-----------------------------------------------------------------|-----------------------------------------------------------------------|---------------------|
| 2, 3 | Creating situational awareness | High frequency of meetings<br>Two-way communication in meetings | Feeling connected, supported and involved<br>Feeling safe and trusted | I1, I3, I5, I6, I13 |
|------|--------------------------------|-----------------------------------------------------------------|-----------------------------------------------------------------------|---------------------|

### **2.4 Recognition and respect**

|      |                                                          |                                                                                                        |                                                                        |                                   |
|------|----------------------------------------------------------|--------------------------------------------------------------------------------------------------------|------------------------------------------------------------------------|-----------------------------------|
| 2, 3 | Recognition and respect among a highly diverse workforce | Leadership behaviour (role modelling)                                                                  | Strengthening relations based on mutual acceptance<br>Big team feeling | I2, I10, I11                      |
| 2, 3 | Recognition and respect among a highly diverse workforce | Network communication<br>Mutual support, Sharing knowledge and expertise<br>Commitment to a common aim | Strengthening relations based on mutual acceptance<br>Big team feeling | I2, I3, I4, I6, I7, I11, I13, S89 |

---

| Stage* | Theme | Cause | Effect | Source |
|--------|-------|-------|--------|--------|
|--------|-------|-------|--------|--------|

---

## **2.5 Gaining underpinnings for more ambitious collaboration**

|      |                     |                                                       |                                                                                 |                          |
|------|---------------------|-------------------------------------------------------|---------------------------------------------------------------------------------|--------------------------|
| 2, 3 | Service performance | Commitment to common aim and partnership              | Faith in collaboration<br>Big team feeling                                      | I1, I2, I6, I10          |
| 3    | Knowledge gains     | Collaboration within and across partner organisations | Organisational learning,<br>Individual learning experience,<br>Big team feeling | I4, I5, I6, I7, I13, S31 |

---

\*Partnership stages:

1 Formation: Identification of partners, the definition of a common aim, partnership structure

2 Development: Set up of partnership structures, building relationships

3 Solidification: Solidification of partnership structures and relations
